# Supplementary material
Source: publisher site journal article supplement (https://www.dovepress.com/article/338584)
Supplement: Supplementary file 1 [file get_supplementary_file.php]

Supplementary Table 1 Information of immunohistochemical staining

| Antibody | Source | Dilution | Staining pattern |
| --- | --- | --- | --- |
| GSDMD | Feng Shao’s Lab | 1:250 | Membrane/Cytoplasmic/ Nucleus |
| CD3 | Thermo | 1:300 | Cytoplasmic |
| CD4 | ZSGB-BIO | 1:100 | Cytoplasmic |
| CD8 | Thermo | 1:50 | Cytoplasmic |
| CD20 | Thermo | 1:500 | Cytoplasmic |
| CD68 | DAKO | 1:200 | Cytoplasmic |

Supplementary Table 2 The number and proportion of each GSDMD score

| IHC score | membrane | cytoplasm | nucleus |
| --- | --- | --- | --- |
| 0 | 171(96.07%) | 65(36.52%) | 69(38.76%) |
| 1 | 4(2.25%) | 41(23.03%) | 49(27.53%) |
| 2 | 2(1.12%) | 24(13.48%) | 38(21.35%) |
| 3 | 0 | 13(7.30%) | 14(7.87%) |
| 4 | 1(0.56%) | 19(10.67%) | 5(2.81%) |
| 5 | 0 | 16(8.99%) | 3(1.69%) |

Supplementary Table 3 Association between membranous GSDMD expression and peripheral blood indicators

| Peripheral blood indicators  （Mean±SE） | Membranous GSDMD expression（Mean±SE） | | *P* value |
| --- | --- | --- | --- |
| Negative | Positive |
| Albumin | 36.76±0.45 | 35.89±2.85 | 0.701 |
| Platelet | 234.06±6.90 | 227.71±24.79 | 0.854 |
| White blood cell | 6.61±0.20 | 5.31±0.54 | 0.198 |
| Neutrophil | 4.61±0.21 | 3.10±0.47 | 0.167 |
| Lymphocyte | 1.39±0.05 | 1.48±0.24 | 0.714 |
| Monocyte | 0.46±0.02 | 0.37±0.04 | 0.312 |
| Neutrophil percentage | 0.67±0.01 | 0.61±0.03 | 0.179 |
| Lymphocyte percentage | 0.23±0.01 | 0.29±0.03 | 0.157 |
| Monocyte percentage | 0.07±0.00 | 0.07±0.01 | 0.837 |
| PLR | 213.64±15.77 | 163.96±34.19 | 0.537 |
| NLR | 4.36±0.41 | 2.22±0.28 | 0.307 |
| PNI | 43.67±0.56 | 45.70±2.90 | 0.480 |
| LMR | 3.68±0.18 | 4.08±0.47 | 0.666 |

Supplementary Table 4 Association between cytoplasmic GSDMD expression and peripheral blood indicators

| Peripheral blood indicators  （Mean±SE） | Cytoplasmic GSDMD expression | | *P* value |
| --- | --- | --- | --- |
| Negative | Positive |
| Albumin | 36.82±0.71 | 36.67±0.57 | 0.869 |
| Platelet | 227.97±11.04 | 237.21±8.42 | 0.507 |
| White blood cell | 6.56±0.27 | 6.56±0.27 | 0.997 |
| Neutrophil | 4.55±0.29 | 4.56±0.28 | 0.987 |
| Lymphocyte | 1.40±0.09 | 1.40±0.05 | 0.989 |
| Monocyte | 0.46±0.03 | 0.45±0.02 | 0.793 |
| Neutrophil percentage | 0.68±0.02 | 0.66±0.01 | 0.542 |
| Lymphocyte percentage | 0.23±0.01 | 0.23±0.01 | 0.920 |
| Monocyte percentage | 0.07±0.00 | 0.07±0.00 | 0.545 |
| PLR | 213.64±15.77 | 163.96±34.19 | 0.537 |
| NLR | 4.36±0.41 | 2.22±0.28 | 0.307 |
| PNI | 43.67±0.56 | 45.70±2.90 | 0.480 |
| LMR | 3.68±0.18 | 4.08±0.47 | 0.666 |

Supplementary Table 5 Association between nuclear GSDMD expression and peripheral blood indicators

| Peripheral blood indicators  （Mean±SE） | Nuclear GSDMD expression | | *P* value |
| --- | --- | --- | --- |
| Negative | Positive |
| Albumin | 36.64±0.74 | 36.78±0.55 | 0.880 |
| Platelet | 238.43±10.79 | 230.86±8.55 | 0.582 |
| White blood cell | 6.53±0.24 | 6.57±0.28 | 0.905 |
| Neutrophil | 4.49±0.26 | 4.59±0.29 | 0.804 |
| Lymphocyte | 1.45±0.08 | 1.37±0.06 | 0.397 |
| Monocyte | 0.46±0.02 | 0.45±0.02 | 0.683 |
| Neutrophil percentage | 0.67±0.01 | 0.67±0.01 | 0.970 |
| Lymphocyte percentage | 0.24±0.01 | 0.23±0.01 | 0.846 |
| Monocyte percentage | 0.07±0.00 | 0.07±0.00 | 0.746 |
| PLR | 189.51±12.42 | 225.15±23.17 | 0.177 |
| NLR | 3.58±0.27 | 4.70±0.61 | 0.094 |
| PNI | 43.92±0.91 | 43.64±0.68 | 0.808 |
| LMR | 3.62±0.28 | 3.73±0.22 | 0.757 |


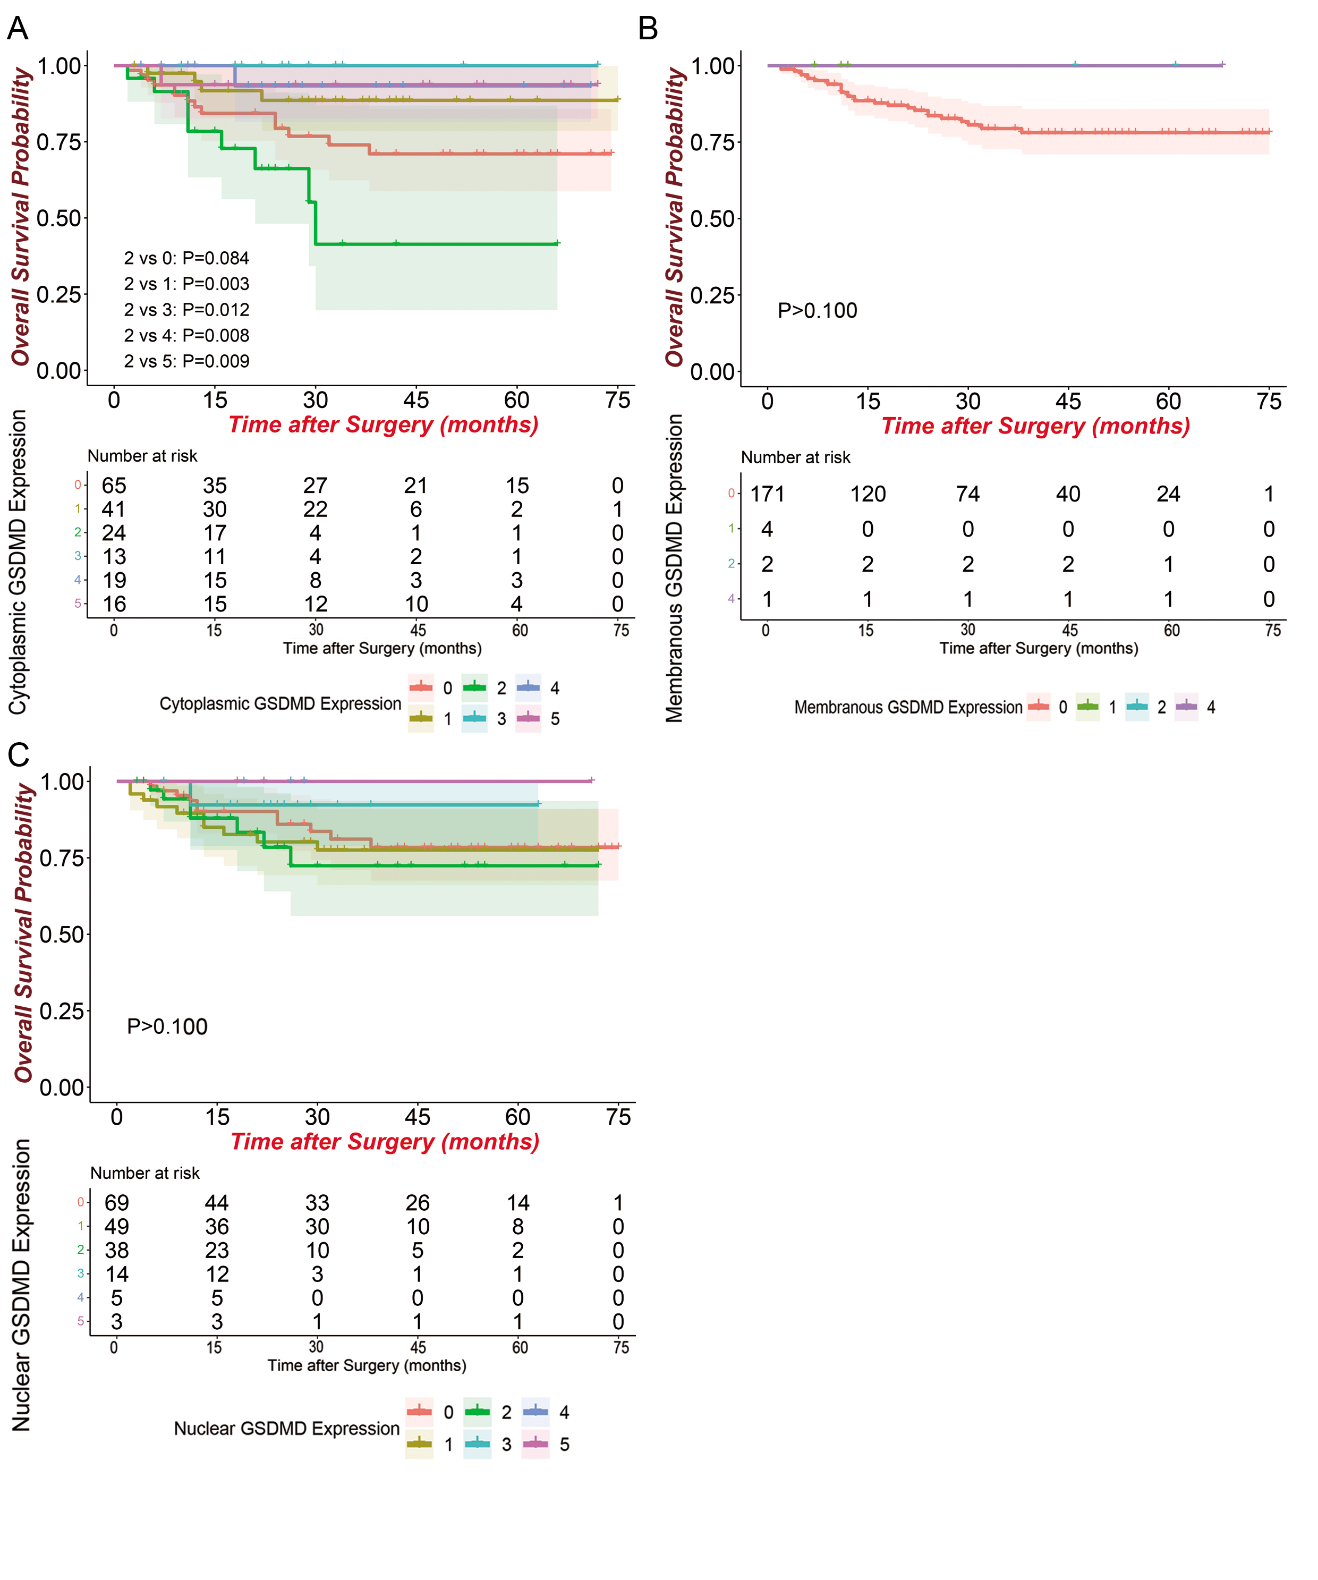


Supplementary Fig. 1 Kaplan-Meier curves of GSDMD expression in cytoplasm (A), membrane (B) and nucleus (C) (log-rank test).
